# Supplementary material for: Pediatric Lower Urinary Tract Dysfunction: A Comprehensive Exploration of Clinical Implications and Diagnostic Strategies
Source: MDPI journal article supplement (doi:10.3390/biomedicines12050945), 2024-04-24
Supplement: s1 [file s1]

### Dysfunctional Voiding Scoring System (DVSS)

Patient Name: \_\_\_\_\_ Date of Birth: \_\_\_\_\_ Today's Date: \_\_\_\_\_

| Over the last month                                                                            | Almost<br>Never | Less than<br>half the<br>time | About half<br>of the<br>time | Almost<br>every time | Not<br>Available |
|------------------------------------------------------------------------------------------------|-----------------|-------------------------------|------------------------------|----------------------|------------------|
| 1. I have had wet clothes or wet underwear during the night.                                   | 0               | 1                             | 2                            | 3                    | NA               |
| 2. When I wet myself, my underwear is soaked.                                                  | 0               | 1                             | 2                            | 3                    | NA               |
| 3. I miss having a bowel movement every day.                                                   | 0               | 1                             | 2                            | 3                    | NA               |
| 4. I have to push for my bowel movements to come out.                                          | 0               | 1                             | 2                            | 3                    | NA               |
| 5. I only go to the bathroom one or two times each day.                                        | 0               | 1                             | 2                            | 3                    | NA               |
| 6. I can hold onto my pee by crossing my legs, squatting or doing the "pee dance".             | 0               | 1                             | 2                            | 3                    | NA               |
| 7. When I have to pee, I cannot wait.                                                          | 0               | 1                             | 2                            | 3                    | NA               |
| 8. I have to push to pee.                                                                      | 0               | 1                             | 2                            | 3                    | NA               |
| 9. When I pee it hurts.                                                                        | 0               | 1                             | 2                            | 3                    | NA               |
| 10. Parents to answer. Has your child experienced something stressful like the examples below? | No (0)          |                               |                              | Yes (3)              |                  |
| Total                                                                                          |                 |                               |                              |                      |                  |

#### Examples:

New baby

New home

New school

School problems

Abuse (sexual/physical)

Home problems (divorce/death)

Special events (birthday)

Accident/injury

Other
